# Supplementary material for: Newly emerged enterovirus-A71 C4 sublineage may be more virulent than B5 in the 2015–2016 hand-foot-and-mouth disease outbreak in northern Vietnam
Source: PubMed Central journal article supplement (PMC6957505; doi:10.1038/s41598-019-56703-5), 2020-01-13
Supplement: 41598_2019_56703_MOESM1_ESM.pdf [file 41598_2019_56703_MOESM1_ESM.pdf]

**Newly emerged enterovirus-A71 C4 sublineage may be more virulent than B5 in the 2015–  
2016 hand-foot-and-mouth disease outbreak in northern Vietnam**

Son T Chu<sup>1+</sup>, Kyouusuke Kobayashi<sup>2+</sup>, Xiuqiong Bi<sup>1</sup>, Azumi Ishizaki<sup>1,3</sup>, Tu T Tran<sup>4</sup>, Thuy T B Phung<sup>5</sup>, Chung T. T. Pham<sup>5</sup>, Lam V Nguyen<sup>6</sup>, Tuan A Ta<sup>7</sup>, Dung T K Khu<sup>8</sup>, Masanobu Ago<sup>9</sup>, An N Pham<sup>6,10</sup>, Satoshi Koike<sup>2</sup>, and Hiroshi Ichimura<sup>1,3\*</sup>

<sup>1</sup>Department of Viral Infection and International Health, Graduate School of Medical Sciences; Kanazawa University, Kanazawa, 9208640, Japan; <sup>2</sup>Neurovirology Project, Tokyo Metropolitan Institute of Medical Science, Tokyo, 1568506, Japan; <sup>3</sup>Graduate School of Advanced Preventive Medical Sciences; Kanazawa University, Kanazawa, 9208640, Japan; <sup>4</sup>Outpatient Department, Vietnam National Hospital of Pediatrics, Hanoi, 10000, Vietnam; <sup>5</sup>Research Biomolecular for Infectious Disease Department, Vietnam National Hospital of Pediatrics, Hanoi, 10000, Vietnam; <sup>6</sup>Center for Pediatric Tropical Diseases, Vietnam National Hospital of Pediatrics, Hanoi, 10000, Vietnam; <sup>7</sup>Medical Intensive Care Unit, Vietnam National Hospital of Pediatrics, Hanoi, 10000, Vietnam; <sup>8</sup>Neonatal Intensive Care Unit, Vietnam National Hospital of Pediatrics, Hanoi, 10000, Vietnam; <sup>9</sup>Department of Virology, Institute of Tropical Medicine, Nagasaki University, Nagasaki, 8528523, Japan; <sup>10</sup>Department of Pediatrics, Hanoi Medical University, Hanoi, 10000, Vietnam

**Supplementary Figure S1. Body weight change of hSCARB2-tg mice was daily followed up for 14 days post infection with EV-A71.** hSCARB2-tg mice were inoculated with EV-A71 B5 (19 strains) and C4 (eight strains) intraperitoneally at  $5 \times 10^5$  TCID<sub>50</sub>. The viruses were isolated from the patients with different clinical grade. Of them, 10, 8 and 1 strains were from grade 1, grade 2 and grade 4 of B5-infected patients, respectively. Among eight strains of C4, one was from the patient with grade 1 and seven from those with grade 2. **x** denotes the death mice, **x** denotes the sacrificed mice,  denotes the mice with paralysis,  denotes the mice with no clinical symptom. EV: enterovirus, hSCARB2-tg mice: mice that carry the human scavenger receptor class B2 transgene.

**Supplementary Figure S2. Paralysis and mortality rates of hSCARB2-tg mice infected with EV-A71 B5 isolated from patients with different clinical grades.** hSCARB2-tg mice were inoculated with EV-A71 B5 (19 strains) intraperitoneally at  $5 \times 10^5$  TCID<sub>50</sub>. The B5 strains were isolated from the patients with different clinical grade. Of them, 10, 8 and 1 strains were from grade 1, grade 2 and grade 4 of B5-infected patients, respectively. A: Paralysis rates at 14 days post-infection. B: Mortality rates at 14 days post-infection. P-values were calculated with the Mann-Whitney U test. EV: enterovirus, hSCARB2-tg mice: mice that carry the human scavenger receptor class B2 transgene.

Supplementary Figure S1

**B5**

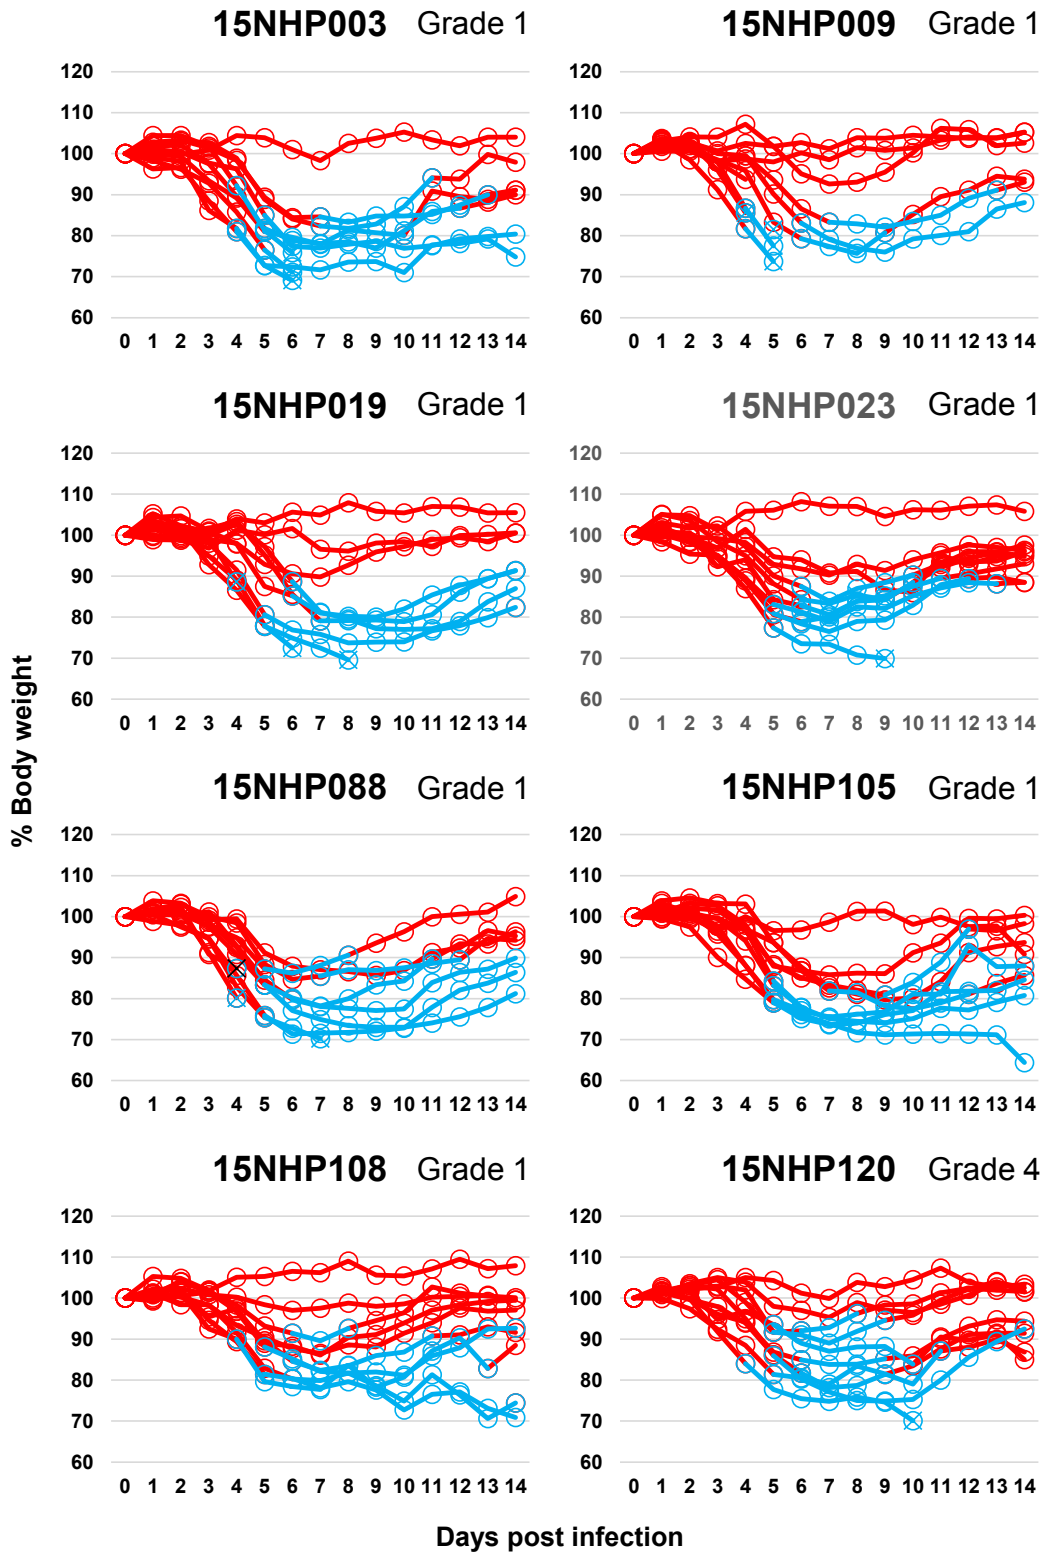

**B5**

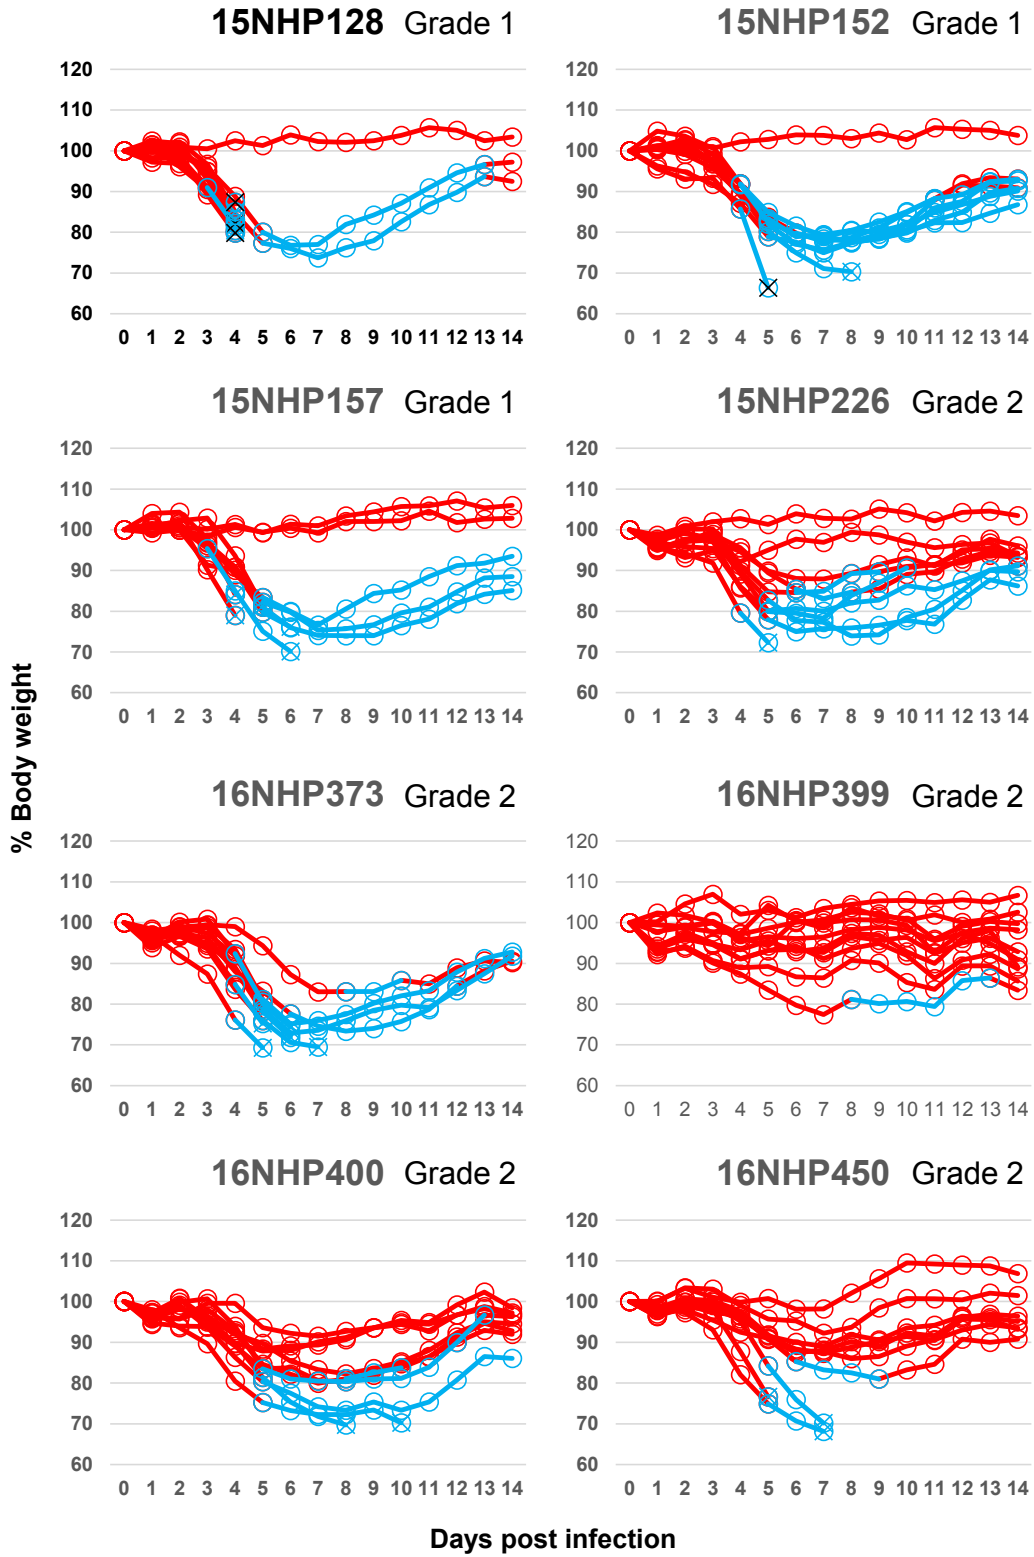

**B5**

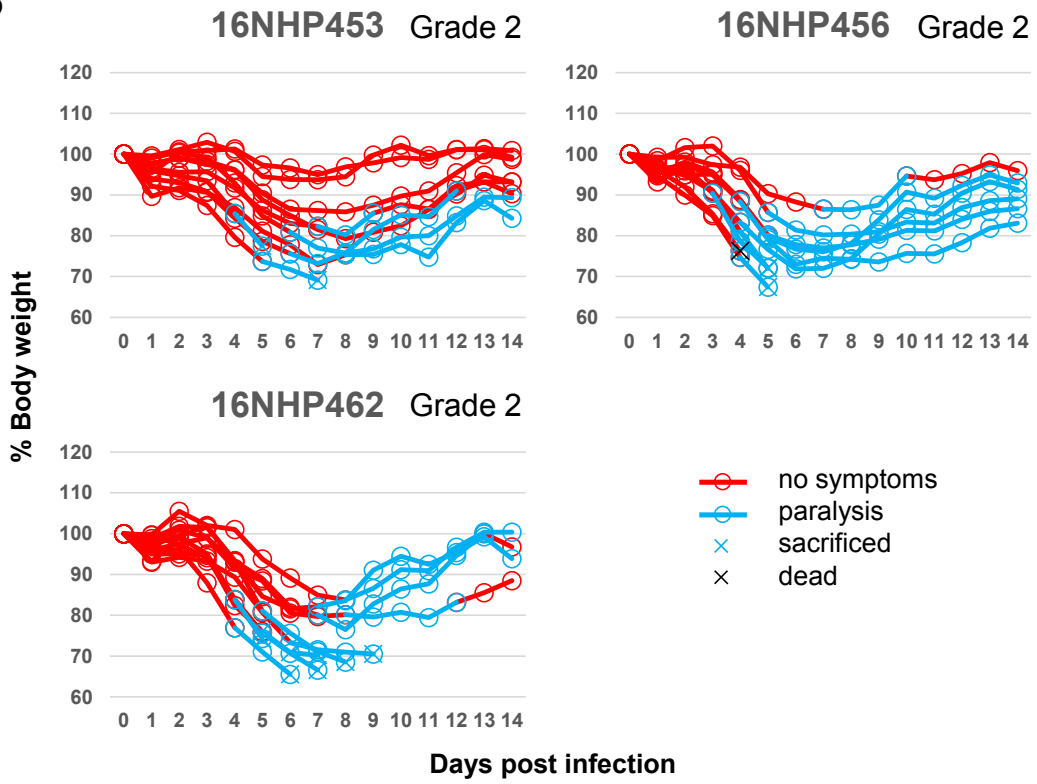

# C4

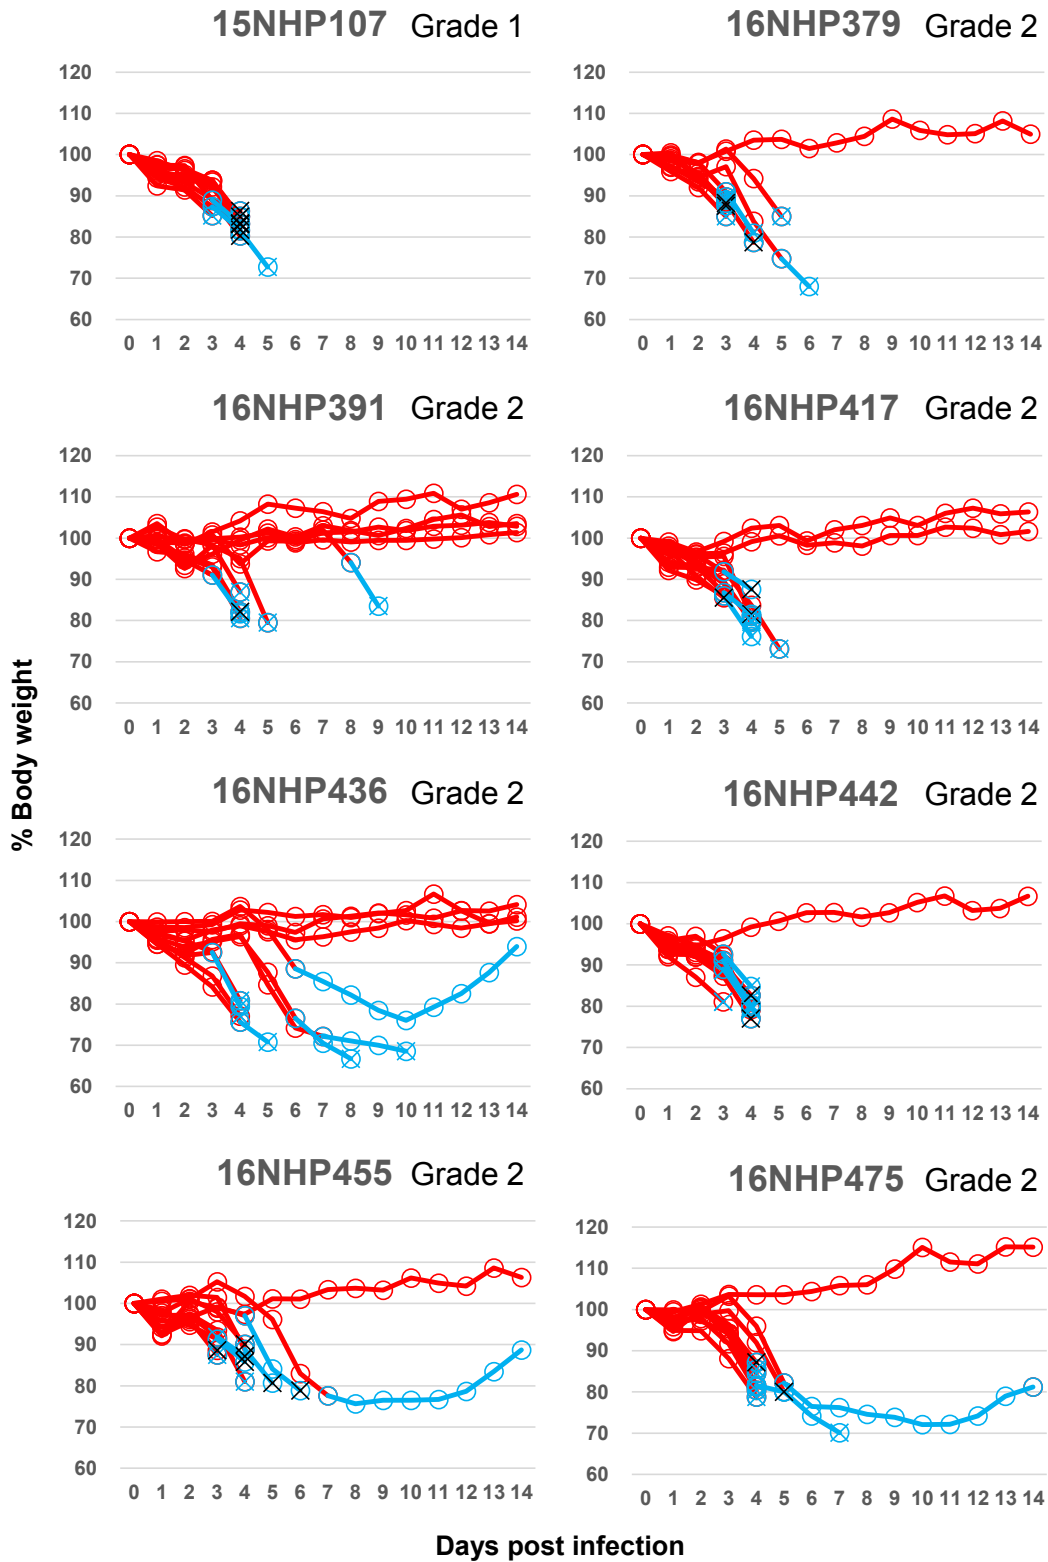

Supplementary Figure S2

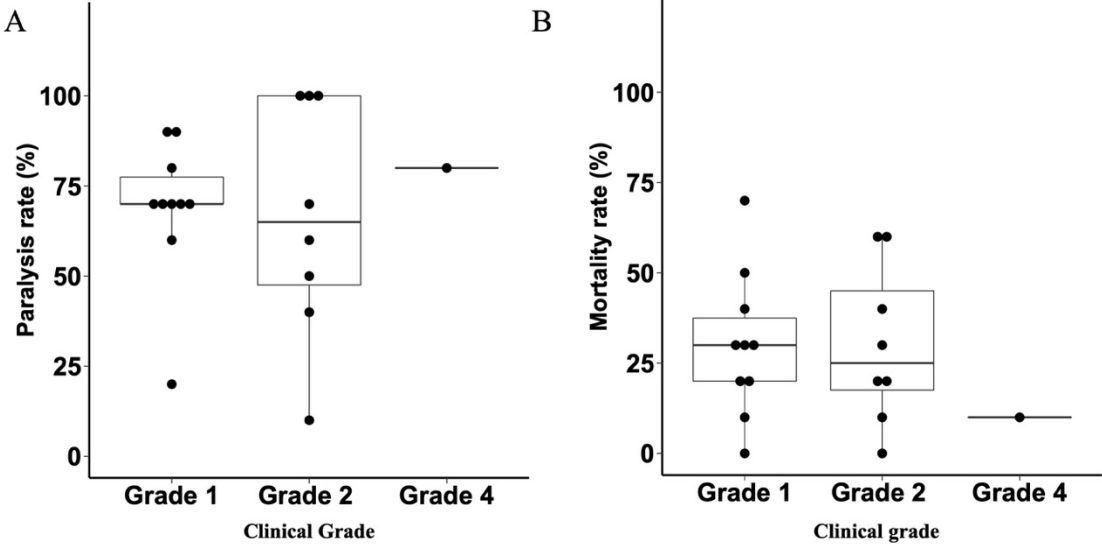

**Supplementary Table S1.** Summary of the next generation sequencing analysis of the EV-A71 strains

| virus    | Subgenogroups | mapped_reads | average_depth | Abundance of VP1-145<br>mutation (%) |
|----------|---------------|--------------|---------------|--------------------------------------|
| 15NHP002 | B5            | 307823       | 5839.17       | 0.78*                                |
| 15NHP003 | B5            | 696335       | 7657.62       | 0.00                                 |
| 15NHP009 | B5            | 635531       | 7643.31       | 0.00                                 |
| 15NHP019 | B5            | 623879       | 7605.05       | 0.00                                 |
| 15NHP023 | B5            | 390067       | 6849.36       | 0.00                                 |
| 15NHP088 | B5            | 829751       | 7725.44       | 0.00                                 |
| 15NHP105 | B5            | 239500       | 4650.57       | 0.00                                 |
| 15NHP108 | B5            | 182415       | 3550.84       | 0.00                                 |
| 15NHP120 | B5            | 260063       | 4972.82       | 0.00                                 |
| 15NHP128 | B5            | 275994       | 5304.13       | 0.00                                 |
| 15NHP152 | B5            | 169800       | 3266.71       | 0.00                                 |
| 15NHP157 | B5            | 437939       | 7134.11       | 0.00                                 |
| 15NHP226 | B5            | 173209       | 3358.33       | 0.00                                 |
| 16NHP373 | B5            | 226537       | 4352.49       | 0.00                                 |
| 16NHP399 | B5            | 1037217      | 7777.11       | 0.00                                 |
| 16NHP400 | B5            | 501407       | 7377.05       | 0.00                                 |
| 16NHP401 | B5            | 1011903      | 7786.68       | 1.65*                                |
| 16NHP415 | B5            | 1206752      | 7807.39       | 1.55*                                |
| 16NHP446 | B5            | 955315       | 7785.03       | 1.71*                                |
| 16NHP450 | B5            | 1003009      | 7789.88       | 0.00                                 |
| 16NHP453 | B5            | 1375485      | 7838.46       | 0.00                                 |
| 16NHP456 | B5            | 1383746      | 7832.95       | 0.00                                 |
| 16NHP459 | B5            | 1444424      | 7839.17       | 1.39*                                |



|          |    |        |         |      |
|----------|----|--------|---------|------|
| 16NHP462 | B5 | 833024 | 7782.74 | 0.00 |
| 15NHP107 | C4 | 291161 | 5695.18 | 0.00 |
| 16NHP379 | C4 | 191191 | 3784.55 | 0.00 |
| 16NHP391 | C4 | 223860 | 4421.73 | 0.00 |
| 16NHP417 | C4 | 291526 | 5736.53 | 0.00 |
| 16NHP436 | C4 | 483159 | 7341.13 | 0.00 |
| 16NHP442 | C4 | 310591 | 6070.31 | 0.00 |
| 16NHP455 | C4 | 195836 | 3868.44 | 0.00 |
| 16NHP475 | C4 | 231924 | 4564.31 | 0.00 |

\*amino acid mutation to Glycine was detected.
